# Supplementary material
Source: ML conference proceedings conference paper supplement (https://proceedings.neurips.cc/paper_files/paper/2016/hash/fe70c36866add1572a8e2b96bfede7bf-Abstract.html)
Supplement: Supplementary file [file fe70c36866add1572a8e2b96bfede7bf-Supplemental.zip]

---

# Balancing Suspense and Surprise: Timely Decision Making with Endogenous Information Acquisition

---

**Ahmed M. Alaa**  
 Electrical Engineering Department  
 University of California, Los Angeles  
 ahmedmalaa@ucla.edu

**Mihaela van der Schaar**  
 Electrical Engineering Department  
 University of California, Los Angeles  
 mihaela@ee.ucla.edu

## Proofs

### Proof of Theorem 1

The posterior belief process  $(\mu_t)_{t \in \mathbb{R}_+}$  is given by

$$\begin{aligned}
 \mu_t &= \mathbb{P}(\Theta = 1 | \tilde{\mathcal{F}}_t) \\
 &\stackrel{(a)}{=} \mathbb{P}(\Theta = 1 | \sigma(X(P_t^\pi)), \mathcal{S}_t) \\
 &= \mathbf{1}_{\{t \geq \tau\}} \cdot \mathbb{P}(\Theta = 1 | \sigma(X(P_t^\pi)), t \geq \tau) + \mathbf{1}_{\{t < \tau\}} \cdot \mathbb{P}(\Theta = 1 | \sigma(X(P_t^\pi)), t < \tau) \\
 &\stackrel{(b)}{=} \mathbf{1}_{\{t \geq \tau\}} + \mathbf{1}_{\{t < \tau\}} \cdot \mathbb{P}(\Theta = 1 | \sigma(X(P_t^\pi)), t < \tau),
 \end{aligned} \tag{1}$$

where we have used the fact that  $\tilde{\mathcal{F}}_t = \sigma(X(P_t^\pi)) \vee \mathcal{S}_t$  in (a), and the fact that the event  $\{t \geq \tau\}$  is  $\tilde{\mathcal{F}}_t$ -measurable in (b), and hence  $\mathbb{P}(\Theta = 1 | \sigma(X(P_t^\pi)), t \geq \tau) = 1$ . Therefore, we can write the posterior belief process  $(\mu_t)_{t \in \mathbb{R}_+}$  in the following form

$$\mu_t = \begin{cases} 1, & \text{for } t \geq \tau \\ \mathbb{P}(\Theta = 1 | \sigma(X(P_t^\pi)), t < \tau), & \text{for } 0 \leq t < \tau. \end{cases}$$

Now we focus on computing  $\mathbb{P}(\Theta = 1 | \sigma(X(P_t^\pi)), t < \tau)$ . Note that using Bayes' rule, we have that

$$\begin{aligned}
 \mathbb{P}(\Theta = 1 | \sigma(X(P_t^\pi)), t < \tau) &= \frac{\mathbb{P}(\Theta = 1, \sigma(X(P_t^\pi)), t < \tau)}{\mathbb{P}(\sigma(X(P_t^\pi)), t < \tau)} \\
 &= \frac{\mathbb{P}(\Theta = 1, \sigma(X(P_t^\pi)), t < \tau)}{\sum_{\theta \in \{0,1\}} \mathbb{P}(\Theta = \theta, \sigma(X(P_t^\pi)), t < \tau)} \\
 &= \frac{d\mathbb{P}(\sigma(X(P_t^\pi)), t < \tau | \Theta = 1) \mathbb{P}(\Theta = 1)}{\sum_{\theta \in \{0,1\}} d\mathbb{P}(\sigma(X(P_t^\pi)), t < \tau | \Theta = \theta) \mathbb{P}(\Theta = \theta)} \\
 &= \frac{d\mathbb{P}(\sigma(X(P_t^\pi)), t < \tau | \Theta = 1) \mathbb{P}(\Theta = 1)}{d\mathbb{P}(\sigma(X(P_t^\pi)), t < \tau | \Theta = 0) \mathbb{P}(\Theta = 0) + d\mathbb{P}(\sigma(X(P_t^\pi)), t < \tau | \Theta = 1) \mathbb{P}(\Theta = 1)} \\
 &= \frac{p d\mathbb{P}(\sigma(X(P_t^\pi)), t < \tau | \Theta = 1)}{(1-p) d\mathbb{P}(\sigma(X(P_t^\pi)), t < \tau | \Theta = 0) + p d\mathbb{P}(\sigma(X(P_t^\pi)), t < \tau | \Theta = 1)} \\
 &= \left( 1 + \frac{1-p}{p} \cdot \frac{d\mathbb{P}(\sigma(X(P_t^\pi)), t < \tau | \Theta = 0)}{d\mathbb{P}(\sigma(X(P_t^\pi)), t < \tau | \Theta = 1)} \right)^{-1} \\
 &= \left( 1 + \frac{1-p}{p} \cdot \frac{d\tilde{\mathbb{P}}_0(P_t^\pi)}{d\tilde{\mathbb{P}}_1(P_t^\pi)} \right)^{-1},
 \end{aligned} \tag{2}$$

where the existence of the Radon-Nykodim derivative  $\frac{d\tilde{\mathbb{P}}_o(P_t^\pi)}{d\tilde{\mathbb{P}}_1(P_t^\pi)}$  follows from the fact that  $\tilde{\mathbb{P}}_o(P_t^\pi) < \tilde{\mathbb{P}}_1(P_t^\pi)$ . Hence, we have that

$$\mu_t = \begin{cases} 1, & \text{for } t \geq \tau \\ \left(1 + \frac{1-p}{p} \cdot \frac{d\tilde{\mathbb{P}}_o(P_t^\pi)}{d\tilde{\mathbb{P}}_1(P_t^\pi)}\right)^{-1}, & \text{for } 0 \leq t < \tau. \end{cases}$$

Now we focus on evaluating  $\frac{d\tilde{\mathbb{P}}_o(P_t^\pi)}{d\tilde{\mathbb{P}}_1(P_t^\pi)}$ . Using a further application of Bayes' rule we have that

$$\begin{aligned} \left(\frac{d\tilde{\mathbb{P}}_o(P_t^\pi)}{d\tilde{\mathbb{P}}_1(P_t^\pi)}\right)^{-1} &= \frac{d\mathbb{P}(\sigma(X(P_t^\pi)), t < \tau | \Theta = 1)}{d\mathbb{P}(\sigma(X(P_t^\pi)), t < \tau | \Theta = 0)} \\ &= \frac{\mathbb{P}(t < \tau | X(P_t^\pi), \Theta = 1) \cdot d\mathbb{P}(X(P_t^\pi) | \Theta = 1)}{\mathbb{P}(t < \tau | X(P_t^\pi), \Theta = 0) \cdot d\mathbb{P}(X(P_t^\pi) | \Theta = 0)} \\ &= \frac{d\mathbb{P}(X(P_t^\pi) | \Theta = 1)}{d\mathbb{P}(X(P_t^\pi) | \Theta = 0)} \cdot \mathbb{P}(t < \tau | X(P_t^\pi), \Theta = 1), \end{aligned} \quad (3)$$

where we have used the fact that  $\mathbb{P}(t < \tau | X(P_t^\pi), \Theta = 0) = 1$ . For any partition  $P_t^\pi$ , the *likelihood ratio*  $\frac{d\mathbb{P}(X(P_t^\pi) | \Theta = 1)}{d\mathbb{P}(X(P_t^\pi) | \Theta = 0)}$  is an elementary predictable process that takes an initial value that is equal to the prior  $p$  (when no samples are initially observed), and then takes constant values of  $\frac{d\mathbb{P}(X(P_t^\pi) | \Theta = 1)}{d\mathbb{P}(X(P_t^\pi) | \Theta = 0)}$  in the interval between any two samples in the partition (only when a new sample is observed, the likelihood is updated). Hence, we have that

$$\frac{d\mathbb{P}(X(P_t^\pi) | \Theta = 1)}{d\mathbb{P}(X(P_t^\pi) | \Theta = 0)} = p \mathbf{1}_{\{t=0\}} + \sum_{k=1}^{N(P_t^\pi)-1} \frac{\mathbb{P}(X(P_t^\pi) | \Theta = 1)}{\mathbb{P}(X(P_t^\pi) | \Theta = 0)} \mathbf{1}_{\{P_t^\pi(k-1) \leq t \leq P_t^\pi(k)\}}.$$

The process is predictable since the likelihood remains constant as long as no new samples are observed. Modulated by the *survival probability*,  $\left(\frac{d\tilde{\mathbb{P}}_o(P_t^\pi)}{d\tilde{\mathbb{P}}_1(P_t^\pi)}\right)^{-1}$  can be written as

$$p \mathbb{P}(\tau > t | \Theta = 1) \mathbf{1}_{\{t < P_t^\pi(k)\}} + \sum_{k=1}^{N(P_t^\pi)-1} \frac{\mathbb{P}(X(P_t^\pi) | \Theta = 1)}{\mathbb{P}(X(P_t^\pi) | \Theta = 0)} \mathbb{P}(\tau > t | \sigma(X(P_t^\pi), \Theta = 1) \mathbf{1}_{\{P_t^\pi(k) \leq t \leq P_t^\pi(k+1)\}}).$$

Under usual regularity conditions on  $\mathbb{P}(\tau > t | \sigma(X(P_t^\pi), \Theta = 1))$  it is easy to see that  $\left(\frac{d\tilde{\mathbb{P}}_o(P_t^\pi)}{d\tilde{\mathbb{P}}_1(P_t^\pi)}\right)^{-1}$  will have jumps only at the time instances in the partition  $P_t^\pi$  and at the stopping time  $\tau$ , i.e. a total of  $N(P_{T_\pi \wedge \tau}^\pi) + \mathbf{1}_{\{\tau < \infty\}}$  jumps at the time indexes in  $P_{t \wedge \tau}^\pi \cup \{\tau\}$ .  $\square$

### Proof of Corollary 1

Recall that from Theorem 1, we know that the posterior belief process can be written as

$$\mu_t = \mathbf{1}_{\{t \geq \tau\}} + \mathbf{1}_{\{t < \tau\}} \mathbb{P}(\Theta = 1 | \tilde{\mathcal{F}}_t).$$

Hence, the expected posterior belief at time  $t + \Delta t$  given the information in the filtration  $\tilde{\mathcal{F}}_t$  can be written as

$$\begin{aligned} \mathbb{E} \left[ \mu_{t+\Delta t} \middle| \tilde{\mathcal{F}}_t \right] &= \mathbb{E} \left[ \mathbf{1}_{\{t+\Delta t \geq \tau\}} + \mathbf{1}_{\{t+\Delta t < \tau\}} \mathbb{P}(\Theta = 1 | \tilde{\mathcal{F}}_{t+\Delta t}) \middle| \tilde{\mathcal{F}}_t \right] \\ &= \mathbb{E} \left[ \mathbf{1}_{\{t+\Delta t \geq \tau\}} \middle| \tilde{\mathcal{F}}_t \right] + \mathbb{E} \left[ \mathbf{1}_{\{t+\Delta t < \tau\}} \mathbb{P}(\Theta = 1 | \tilde{\mathcal{F}}_{t+\Delta t}) \middle| \tilde{\mathcal{F}}_t \right] \\ &= \mathbb{P}(\Theta = 1, t + \Delta t \geq \tau | \tilde{\mathcal{F}}_t) + \mathbb{P}(t + \Delta t < \tau | \tilde{\mathcal{F}}_t) \cdot \mathbb{E} \left[ \mathbb{P}(\Theta = 1 | \tilde{\mathcal{F}}_{t+\Delta t}) \middle| \tilde{\mathcal{F}}_t \vee \{t + \Delta t < \tau\} \right], \end{aligned} \quad (1)$$

and hence  $\mathbb{E} \left[ \mu_{t+\Delta t} \middle| \tilde{\mathcal{F}}_t \right]$  can be written as

$$\mathbb{P}(t + \Delta t \geq \tau | \tilde{\mathcal{F}}_t, \Theta = 1) \cdot \mathbb{P}(\Theta = 1 | \tilde{\mathcal{F}}_t) + \mathbb{P}(t + \Delta t < \tau | \tilde{\mathcal{F}}_t) \cdot \mathbb{E} \left[ \mathbb{P}(\Theta = 1 | \tilde{\mathcal{F}}_{t+\Delta t}) \middle| \tilde{\mathcal{F}}_t \vee \{t + \Delta t < \tau\} \right],$$

which is equivalent to

$$\mathbb{E} \left[ \mu_{t+\Delta t} \middle| \tilde{\mathcal{F}}_t \right] = (1 - S_t(\Delta t)) \cdot \mu_t + \mathbb{P}(t + \Delta t < \tau | \tilde{\mathcal{F}}_t) \cdot \mathbb{E} \left[ \mathbb{P}(\Theta = 1 | \tilde{\mathcal{F}}_{t+\Delta t}) \middle| \tilde{\mathcal{F}}_t \vee \{t + \Delta t < \tau\} \right]. \quad (2)$$

Furthermore, the term  $\mathbb{P}(t + \Delta t < \tau | \tilde{\mathcal{F}}_t)$  in the expression above can be expressed as

$$\begin{aligned} \mathbb{P}(t + \Delta t < \tau | \tilde{\mathcal{F}}_t) &= \mathbb{P}(t + \Delta t < \tau | \tilde{\mathcal{F}}_t, \Theta = 1) \cdot \mathbb{P}(\Theta = 1 | \tilde{\mathcal{F}}_t) + \mathbb{P}(t + \Delta t < \tau | \tilde{\mathcal{F}}_t, \Theta = 0) \cdot \mathbb{P}(\Theta = 0 | \tilde{\mathcal{F}}_t) \\ &= S_t(\Delta t) \cdot \mu_t + (1 - \mu_t). \end{aligned} \quad (3)$$

Therefore,  $\mathbb{E} \left[ \mu_{t+\Delta t} \middle| \tilde{\mathcal{F}}_t \right]$  can be written as

$$\mathbb{E} \left[ \mu_{t+\Delta t} \middle| \tilde{\mathcal{F}}_t \right] = (1 - S_t(\Delta t)) \cdot \mu_t + (1 - \mu_t + S_t(\Delta t) \cdot \mu_t) \cdot \mathbb{E} \left[ \mathbb{P}(\Theta = 1 | \tilde{\mathcal{F}}_{t+\Delta t}) \middle| \tilde{\mathcal{F}}_t \vee \{t + \Delta t < \tau\} \right]. \quad (4)$$

Now it remains to evaluate the term  $\mathbb{E} \left[ \mathbb{P}(\Theta = 1 | \tilde{\mathcal{F}}_{t+\Delta t}) \middle| \tilde{\mathcal{F}}_t \vee \{t + \Delta t < \tau\} \right]$  in order to find  $\mathbb{E} \left[ \mu_{t+\Delta t} \middle| \tilde{\mathcal{F}}_t \right]$ . We first note that

$$\mathbb{E} \left[ \mathbb{P}(\Theta = 1 | \tilde{\mathcal{F}}_{t+\Delta t}) \middle| \tilde{\mathcal{F}}_t \vee \{t + \Delta t < \tau\} \right] = \mathbb{E} \left[ \mathbb{P}(\Theta = 1 | \sigma(X^\tau(P_{t+\Delta t}^\pi)), t + \Delta t < \tau) \middle| \tilde{\mathcal{F}}_t \right].$$

We start evaluating the above by first looking at the term  $\mathbb{P}(\Theta = 1 | \sigma(X^\tau(P_{t+\Delta t}^\pi)), t + \Delta t < \tau)$ . Using Bayes' rule, we have that

$$\mathbb{P}(\Theta = 1 | X^\tau(P_{t+\Delta t}^\pi), t + \Delta t < \tau) = \frac{\mathbb{P}(\Theta = 1, X^\tau(P_{t+\Delta t}^\pi), t + \Delta t < \tau)}{\mathbb{P}(X^\tau(P_{t+\Delta t}^\pi), t + \Delta t < \tau)}, \quad (5)$$

where  $\mathbb{P}(\Theta = 1, X^\tau(P_{t+\Delta t}^\pi), t + \Delta t < \tau)$  can be expanded using successive applications of Bayes' rule as

$$\begin{aligned} \mathbb{P}(\Theta = 1 | X^\tau(P_t^\pi), t < \tau) \cdot \mathbb{P}(X^\tau(P_t^\pi), t < \tau) \cdot \mathbb{P}(t + \Delta t < \tau | \Theta = 1, X^\tau(P_t^\pi), t < \tau) \\ \cdot d\mathbb{P}(X^\tau(t + \Delta t) | \Theta = 1, X^\tau(P_t^\pi), t + \Delta t < \tau), \end{aligned}$$

which is equivalent to

$$\mathbb{P}(\Theta = 1, X^\tau(P_{t+\Delta t}^\pi), t + \Delta t < \tau) = \mu_t \cdot S_t(\Delta t) \cdot \mathbb{P}(X^\tau(P_t^\pi), t < \tau) \cdot d\mathbb{P}(X^\tau(t + \Delta t) | \Theta = 1, X^\tau(P_t^\pi), t + \Delta t < \tau) \quad (6)$$

Similarly, it is easy to see that

$$\mathbb{P}(\Theta = 0, X^\tau(P_{t+\Delta t}^\pi), t + \Delta t < \tau) = (1 - \mu_t) \cdot \mathbb{P}(X^\tau(P_t^\pi), t < \tau) \cdot d\mathbb{P}(X^\tau(t + \Delta t) | \Theta = 0, X^\tau(P_t^\pi), t + \Delta t < \tau), \quad (7)$$

where again, we have used the fact that  $\mathbb{P}(t + \Delta t < \tau | \Theta = 0, X^\tau(P_t^\pi), t < \tau) = 1$ . Now we re-formulate (5) using Bayes rule to arrive at the following

$$\mathbb{P}(\Theta = 1 | X^\tau(P_{t+\Delta t}^\pi), t + \Delta t < \tau) = \frac{\mathbb{P}(\Theta = 1, X^\tau(P_{t+\Delta t}^\pi), t + \Delta t < \tau)}{\sum_{\theta \in \{0,1\}} \mathbb{P}(\Theta = \theta, X^\tau(P_{t+\Delta t}^\pi), t + \Delta t < \tau)}, \quad (8)$$

then using (6) and (7), (8) can be further reduced to  $\mathbb{P}(\Theta = 1 | X^\tau(P_{t+\Delta t}^\pi), t + \Delta t < \tau) =$

$$\frac{\mu_t \cdot S_t(\Delta t) \cdot d\mathbb{P}(X^\tau(t + \Delta t) | \Theta = 1, X^\tau(P_t^\pi), t + \Delta t < \tau)}{\mu_t \cdot S_t(\Delta t) \cdot d\mathbb{P}(X^\tau(t + \Delta t) | \Theta = 1, X^\tau(P_t^\pi), t + \Delta t < \tau) + (1 - \mu_t) \cdot d\mathbb{P}(X^\tau(t + \Delta t) | \Theta = 0, X^\tau(P_t^\pi), t + \Delta t < \tau)}. \quad (9)$$

Finally, we use the expression in (9) to evaluate the term

$\mathbb{E} \left[ \mathbb{P}(\Theta = 1 | \sigma(X^\tau(P_{t+\Delta t}^\pi)), t + \Delta t < \tau) \middle| \tilde{\mathcal{F}}_t \right]$  as follows

$$\mathbb{E} \left[ \mathbb{P}(\Theta = 1 | \sigma(X^\tau(P_{t+\Delta t}^\pi)), t + \Delta t < \tau) \middle| \tilde{\mathcal{F}}_t \right] =$$

$$\sum_{\theta \in \{0,1\}} \int \mathbb{P}(\Theta = 1 | X^\tau(P_{t+\Delta t}^\pi), t + \Delta t < \tau) \cdot d\mathbb{P}(X^\tau(t + \Delta t) | \Theta = \theta, X^\tau(P_t^\pi), t + \Delta t < \tau),$$

which, using (9), can be written as

$$\sum_{\theta \in \{0,1\}} \int \frac{\mu_t \cdot S_t(\Delta t) \cdot d\mathbb{P}(X^\tau(t + \Delta t) | \Theta = 1, X^\tau(P_t^\pi), t + \Delta t < \tau) \cdot d\mathbb{P}(X^\tau(t + \Delta t) | \Theta = \theta, X^\tau(P_t^\pi), t + \Delta t < \tau)}{\mu_t \cdot S_t(\Delta t) \cdot d\mathbb{P}(X^\tau(t + \Delta t) | \Theta = 1, X^\tau(P_t^\pi), t + \Delta t < \tau) + (1 - \mu_t) \cdot d\mathbb{P}(X^\tau(t + \Delta t) | \Theta = 0, X^\tau(P_t^\pi), t + \Delta t < \tau)}$$

Since

$$\sum_{\theta \in \{0,1\}} d\mathbb{P}(X^\tau(t + \Delta t) | \Theta = \theta, X^\tau(P_t^\pi), t + \Delta t < \tau) =$$

$$\mu_t \cdot S_t(\Delta t) \cdot d\mathbb{P}(X^\tau(t + \Delta t) | \Theta = 1, X^\tau(P_t^\pi), t + \Delta t < \tau) + (1 - \mu_t) \cdot d\mathbb{P}(X^\tau(t + \Delta t) | \Theta = 0, X^\tau(P_t^\pi), t + \Delta t < \tau),$$

then the integral above reduces to

$$\int \mu_t \cdot S_t(\Delta t) \cdot d\mathbb{P}(X^\tau(t + \Delta t) | \Theta = \theta, X^\tau(P_t^\pi), t + \Delta t < \tau) = \mu_t \cdot S_t(\Delta t) \cdot \int d\mathbb{P}(X^\tau(t + \Delta t) | \Theta = \theta, X^\tau(P_t^\pi), t + \Delta t < \tau),$$

and since the conditional density integrates to 1, i.e.  $\int d\mathbb{P}(X^\tau(t + \Delta t) | \Theta = \theta, X^\tau(P_t^\pi), t + \Delta t < \tau) = 1$ , then we have that

$$\mathbb{E} \left[ \mathbb{P}(\Theta = 1 | \sigma(X^\tau(P_{t+\Delta t}^\pi)), t + \Delta t < \tau) \mid \tilde{\mathcal{F}}_t \right] = \mu_t \cdot S_t(\Delta t).$$

By substituting the above in (4), we arrive at

$$\begin{aligned} \mathbb{E} \left[ \mu_{t+\Delta t} \mid \tilde{\mathcal{F}}_t \right] &= (1 - S_t(\Delta t)) \cdot \mu_t + (1 - \mu_t + S_t(\Delta t) \cdot \mu_t) \cdot \mathbb{E} \left[ \mathbb{P}(\Theta = 1 | \tilde{\mathcal{F}}_{t+\Delta t}) \mid \tilde{\mathcal{F}}_t \vee \{t + \Delta t < \tau\} \right] \\ &= (1 - S_t(\Delta t)) \cdot \mu_t + (1 - \mu_t + S_t(\Delta t) \cdot \mu_t) \cdot \mu_t \cdot S_t(\Delta t) \\ &= \mu_t - \mu_t^2 S_t(\Delta t) (1 - S_t(\Delta t)). \end{aligned} \tag{10}$$

Since  $S_t(\Delta t) \geq 0, \forall t, \Delta t \in \mathbb{R}_+$ , then the term  $\mu_t^2 S_t(\Delta t) (1 - S_t(\Delta t)) \geq 0$ , and it follows that

$$\mathbb{E} \left[ \mu_{t+\Delta t} \mid \tilde{\mathcal{F}}_t \right] \leq \mu_t, \forall t, \Delta t \in \mathbb{R}_+,$$

and hence the posterior belief process  $(\mu_t)_{t \in \mathbb{R}_+}$  is a supermartingale with respect to the filtration  $\tilde{\mathcal{F}}_t$ .  $\square$

## Proof of Theorem 2

Assume a discrete-time version of the problem, where the decision  $(\hat{\theta}_t^\pi, \delta_t^\pi)$  are made in time steps  $\{0, \Delta t, 2\Delta t, \dots\}$ . Define a *value function*  $V : \mathbb{N} \times [0, 1] \rightarrow \mathbb{R}_+$  as a map from the current history to the risk of the best policy given the history  $\tilde{\mathcal{F}}_t$  as follows:

$$V(\tilde{\mathcal{F}}_t) \triangleq \inf_{(\hat{\theta}_\pi, T_\pi \geq t, P_{T_\pi}^\pi \supset P_t^\pi)} \mathbb{E} \left[ \ell(\pi; \Theta) \mid \tilde{\mathcal{F}}_t \right],$$

and define the *action-value function* as the value function achieved by taking actions  $(\hat{\theta}_t, \delta_t)$ , and then following the best policy thereafter. That is, when the decision is to *continue* (i.e.  $\hat{\theta}_t = \emptyset$ ), we have that

$$Q(\tilde{\mathcal{F}}_t; (\hat{\theta}_t = \emptyset, \delta_t = 1)) \triangleq \inf_{(\hat{\theta}_\pi, T_\pi \geq t, P_{T_\pi}^\pi \supset P_t^\pi, t \in P_{T_\pi}^\pi)} \mathbb{E} \left[ \ell(\pi; \Theta) \mid \tilde{\mathcal{F}}_t \right],$$

and

$$Q(\tilde{\mathcal{F}}_t; (\hat{\theta}_t = \emptyset, \delta_t = 0)) \triangleq \inf_{(\hat{\theta}_\pi, T_\pi \geq t, P_{T_\pi}^\pi \supset P_t^\pi, t \notin P_{T_\pi}^\pi)} \mathbb{E} \left[ \ell(\pi; \Theta) \mid \tilde{\mathcal{F}}_t \right].$$

Based on Bellmans optimality principle [24], we know that the optimal policy has to satisfy the following in every time step, i.e.

$$\delta_t^{\pi^*} = \arg \inf_{\delta_t \in \{0,1\}} Q(\tilde{\mathcal{F}}_t; (\hat{\theta}_t = \emptyset, \delta_t)).$$

Now let us look at the optimal partition on  $P_{T_\pi^*}^\pi$  on the discrete time steps  $\{0, \Delta t, 2\Delta t, \dots\}$ , and look at an arbitrary realization for  $P_{T_\pi^*}^\pi$ . Then we pick two consecutive time indexes in  $\{0, \Delta t, 2\Delta t, \dots\}$ ,

say  $n_1\Delta t$  and  $n_2\Delta t$ , with  $n_1 < n_2$ , for which  $\delta_{n_1\Delta t}^{\pi^*} = \delta_{n_2\Delta t}^{\pi^*} = 1$ , and  $\delta_{n\Delta t}^{\pi^*} = 0, \forall n_1 < n < n_2$ . Since the policy is optimal, we know that

$$\arg \inf_{\delta_{n\Delta t} \in \{0,1\}} Q(\tilde{\mathcal{F}}_{n\Delta t}; (\hat{\theta}_{n\Delta t} = \emptyset, \delta_{n\Delta t})) = 0, \forall n_1 < n < n_2,$$

and

$$\arg \inf_{\delta_{n_2\Delta t} \in \{0,1\}} Q(\tilde{\mathcal{F}}_{n_2\Delta t}; (\hat{\theta}_{n_2\Delta t} = \emptyset, \delta_{n_2\Delta t})) = 1,$$

which is equivalent to

$$\arg \inf_{\delta_{n\Delta t} \in \{0,1\}} \mathbb{E} \left[ \ell(\pi; \Theta) \mid \tilde{\mathcal{F}}_{n\Delta t} \right] = 0, \forall n_1 < n < n_2,$$

and

$$\arg \inf_{\delta_{n_2\Delta t} \in \{0,1\}} \mathbb{E} \left[ \ell(\pi; \Theta) \mid \tilde{\mathcal{F}}_{n_2\Delta t} \right] = 1,$$

which can be further decomposed into

$$\arg \inf_{\delta_{n\Delta t} \in \{0,1\}} \mathbb{E} \left[ \ell(\pi; \Theta) \mid \sigma(X(P_{n_1\Delta t}^{\pi^*})) \vee \mathcal{S}_{n\Delta t} \right] = 0, \forall n_1 < n < n_2,$$

and

$$\arg \inf_{\delta_{n_2\Delta t} \in \{0,1\}} \mathbb{E} \left[ \ell(\pi; \Theta) \mid \sigma(X(P_{n_1\Delta t}^{\pi^*})) \vee \mathcal{S}_{n_2\Delta t} \right] = 1,$$

since both functions  $\mathbb{E} [\ell(\pi; \Theta) \mid \sigma(X(P_{n_1\Delta t}^{\pi^*})) \vee \mathcal{S}_{n\Delta t}]$  and  $\mathbb{E} [\ell(\pi; \Theta) \mid \sigma(X(P_{n_1\Delta t}^{\pi^*})) \vee \mathcal{S}_{n_2\Delta t}]$  are  $\tilde{\mathcal{F}}_{n_1\Delta t}$ -measurable, then the decision-maker can compute the optimal decision sequence  $\{\delta_{n\Delta t}\}_{n=n_1+1}^{n_2}$  at time  $n_1\Delta t$ . Since this holds for an arbitrary discretization step  $\Delta t$ , including an arbitrarily small step  $\Delta t \rightarrow 0$ , it follows that the sensing actions construct a predictable point process under the optimal policy, which concludes the Theorem.  $\square$

### Proof of Theorem 3

We start by proving that the optimal decision rule is  $\mathbf{1}_{\{\mu_t > \frac{C_1}{C_o + C_1}\}}$ . Fix an optimal stopping time  $T_{\pi^*}$  and an optimal partition  $P_{T_{\pi^*}}^{\pi^*}$ . The optimal decision rule is given by

$$\hat{\theta}_{\pi^*} = \arg \inf_{\hat{\theta}_{\pi}} \mathbb{E} \left[ \ell(\pi; \Theta) \mid P_{T_{\pi^*}}^{\pi^*}, T_{\pi^*} \right],$$

which is equivalent to

$$\hat{\theta}_{\pi^*} = \arg \inf_{\hat{\theta}_{\pi}} \mathbb{E} \left[ (C_1 \mathbf{1}_{\{\hat{\theta}_{\pi}=0, \theta=1\}} + C_o \mathbf{1}_{\{\hat{\theta}_{\pi}=1, \theta=0\}} + C_d T_{\pi^*}) \mathbf{1}_{\{T_{\pi^*} \leq \tau\}} + C_r \mathbf{1}_{\{T_{\pi^*} > \tau\}} + C_s N(P_{T_{\pi^*}}^{\pi^*} \wedge \tau) \right],$$

which by smoothing can be written as

$$\hat{\theta}_{\pi^*} = \arg \inf_{\hat{\theta}_{\pi}} \mathbb{E} \left[ \mathbb{E} \left[ (C_1 \mathbf{1}_{\{\hat{\theta}_{\pi}=0, \theta=1\}} + C_o \mathbf{1}_{\{\hat{\theta}_{\pi}=1, \theta=0\}} + C_d T_{\pi^*}) \mathbf{1}_{\{T_{\pi^*} \leq \tau\}} + C_r \mathbf{1}_{\{T_{\pi^*} > \tau\}} + C_s N(P_{T_{\pi^*}}^{\pi^*} \wedge \tau) \mid \tilde{\mathcal{F}}_{T_{\pi^*}} \right] \right],$$

and hence we have that

$$\begin{aligned} \hat{\theta}_{\pi^*} = \arg \inf_{\hat{\theta}_{\pi}} \mathbb{E} \left[ \mathbb{E} \left[ (C_1 \mathbf{1}_{\{\hat{\theta}_{\pi}=0, \theta=1\}} + C_o \mathbf{1}_{\{\hat{\theta}_{\pi}=1, \theta=0\}} + C_d T_{\pi^*}) \mathbf{1}_{\{T_{\pi^*} \leq \tau\}} \mid \tilde{\mathcal{F}}_{T_{\pi^*}} \right] + \right. \\ \left. \mathbb{E} \left[ C_r \mathbf{1}_{\{T_{\pi^*} > \tau\}} \mid \tilde{\mathcal{F}}_{T_{\pi^*}} \right] + \mathbb{E} \left[ C_s N(P_{T_{\pi^*}}^{\pi^*} \wedge \tau) \mid \tilde{\mathcal{F}}_{T_{\pi^*}} \right] \right]. \end{aligned}$$

Since the terms  $\mathbb{E} \left[ C_r \mathbf{1}_{\{T_{\pi^*} > \tau\}} \mid \tilde{\mathcal{F}}_{T_{\pi^*}} \right]$ ,  $\mathbb{E} \left[ C_d T_{\pi^*} \mathbf{1}_{\{T_{\pi^*} \leq \tau\}} \mid \tilde{\mathcal{F}}_{T_{\pi^*}} \right]$ , and  $\mathbb{E} \left[ C_s N(P_{T_{\pi^*}}^{\pi^*} \wedge \tau) \mid \tilde{\mathcal{F}}_{T_{\pi^*}} \right]$  are the information and delay costs, which do not depend on the choice of  $\hat{\theta}_{\pi}$ , we have that

$$\hat{\theta}_{\pi^*} = \arg \inf_{\hat{\theta}_{\pi}} \mathbb{E} \left[ \mathbb{E} \left[ (C_1 \mathbf{1}_{\{\hat{\theta}_{\pi}=0, \theta=1\}} + C_o \mathbf{1}_{\{\hat{\theta}_{\pi}=1, \theta=0\}}) \mathbf{1}_{\{T_{\pi^*} \leq \tau\}} \mid \tilde{\mathcal{F}}_{T_{\pi^*}} \right] \right],$$

which can be reduced to the following

$$\begin{aligned} \hat{\theta}_{\pi^*} = \arg \inf_{\hat{\theta}_{\pi}} \mathbb{E} \left[ \mathbb{E} \left[ (C_1 \mathbf{1}_{\{\hat{\theta}_{\pi}=0, \theta=1\}} + C_o \mathbf{1}_{\{\hat{\theta}_{\pi}=1, \theta=0\}}) \mathbf{1}_{\{T_{\pi^*} \leq \tau\}} \mid \tilde{\mathcal{F}}_{T_{\pi^*}} \right] \right] \\ = \arg \inf_{\hat{\theta}_{\pi}} \mathbb{E} \left[ C_1 \cdot \mathbb{E} \left[ \mathbf{1}_{\{\hat{\theta}_{\pi}=0, \theta=1\}} \cdot \mathbf{1}_{\{T_{\pi^*} \leq \tau\}} \mid \tilde{\mathcal{F}}_{T_{\pi^*}} \right] + C_o \cdot \mathbb{E} \left[ \mathbf{1}_{\{\hat{\theta}_{\pi}=1, \theta=0\}} \cdot \mathbf{1}_{\{T_{\pi^*} \leq \tau\}} \mid \tilde{\mathcal{F}}_{T_{\pi^*}} \right] \right] \\ = \arg \inf_{\hat{\theta}_{\pi}} \mathbb{E} \left[ C_1 \cdot \mathbb{E} \left[ \mathbf{1}_{\{\hat{\theta}_{\pi}=0\}} \cdot \mathbf{1}_{\{\theta=1\}} \cdot \mathbf{1}_{\{T_{\pi^*} \leq \tau\}} \mid \tilde{\mathcal{F}}_{T_{\pi^*}} \right] + C_o \cdot \mathbb{E} \left[ \mathbf{1}_{\{\hat{\theta}_{\pi}=1\}} \cdot \mathbf{1}_{\{\theta=0\}} \cdot \mathbf{1}_{\{T_{\pi^*} \leq \tau\}} \mid \tilde{\mathcal{F}}_{T_{\pi^*}} \right] \right]. \end{aligned} \quad (1)$$

Since  $\mathbf{1}_{\{\hat{\theta}_\pi = \theta\}}$  is an  $\tilde{\mathcal{F}}_{T_{\pi^*}}$ -measurable function, we have that

$$\begin{aligned}\hat{\theta}_{\pi^*} &= \arg \inf_{\hat{\theta}_\pi} \mathbb{E} \left[ C_1 \cdot \mathbb{E} \left[ \mathbf{1}_{\{\hat{\theta}_\pi = 0\}} \cdot \mathbf{1}_{\{\theta = 1\}} \cdot \mathbf{1}_{\{T_{\pi^*} \leq \tau\}} \mid \tilde{\mathcal{F}}_{T_{\pi^*}} \right] + C_1 \cdot \mathbb{E} \left[ \mathbf{1}_{\{\hat{\theta}_\pi = 1\}} \cdot \mathbf{1}_{\{\theta = 0\}} \cdot \mathbf{1}_{\{T_{\pi^*} \leq \tau\}} \mid \tilde{\mathcal{F}}_{T_{\pi^*}} \right] \right] \\ &= \arg \inf_{\hat{\theta}_\pi} \mathbb{E} \left[ C_1 \cdot \mathbf{1}_{\{\hat{\theta}_\pi = 0\}} \cdot \mathbb{E} \left[ \mathbf{1}_{\{\theta = 1\}} \cdot \mathbf{1}_{\{T_{\pi^*} \leq \tau\}} \mid \tilde{\mathcal{F}}_{T_{\pi^*}} \right] + C_o \cdot \mathbf{1}_{\{\hat{\theta}_\pi = 1\}} \cdot \mathbb{E} \left[ \mathbf{1}_{\{\theta = 0\}} \cdot \mathbf{1}_{\{T_{\pi^*} \leq \tau\}} \mid \tilde{\mathcal{F}}_{T_{\pi^*}} \right] \right] \\ &= \arg \inf_{\hat{\theta}_\pi} \mathbb{E} \left[ C_1 \cdot \mathbf{1}_{\{\hat{\theta}_\pi = 0\}} \cdot (1 - \mu_{T_{\pi^*}}) + C_o \cdot \mathbf{1}_{\{\hat{\theta}_\pi = 1\}} \cdot \mu_{T_{\pi^*}} \right] \\ &= \arg \inf_{\hat{\theta}_\pi} \mathbb{E} \left[ C_1 \cdot \mathbf{1}_{\{\hat{\theta}_\pi = 0\}} \cdot (1 - \mu_{T_{\pi^*}}) + C_o \cdot \mathbf{1}_{\{\hat{\theta}_\pi = 1\}} \cdot \mu_{T_{\pi^*}} \right],\end{aligned}\tag{2}$$

which is simply minimized by setting  $\hat{\theta}_\pi = 1$  whenever  $C_1(1 - \mu_{T_{\pi^*}}) > C_o \mu_{T_{\pi^*}}$ , hence we have that  $\hat{\theta}_\pi = \mathbf{1}_{\{\cdot\}}$ .

Now we resume by first defining the value and the action-value functions, and find the policy characteristics under Bellman optimality conditions.

Define a *value function*  $V : \mathbb{N} \times [0, 1] \rightarrow \mathbb{R}_+$  as a map from the current history to the risk of the best policy given the history  $\tilde{\mathcal{F}}_t$  as follows:

$$V(\tilde{\mathcal{F}}_t) \triangleq \inf_{(\hat{\theta}_\pi, T_\pi \geq t, P_{T_\pi}^\pi \supset P_t^\pi)} \mathbb{E} \left[ \ell(\pi; \Theta) \mid \tilde{\mathcal{F}}_t \right],$$

and define the *action-value function* as the value function achieved by taking actions  $(\hat{\theta}_t, \delta_t)$ , and then following the best policy thereafter, i.e.

$$Q(\tilde{\mathcal{F}}_t; (\hat{\theta}_t, \delta_t)) \triangleq \inf_{(\hat{\theta}_\pi, T_\pi \geq t + \delta_t, P_{T_\pi}^\pi \supset P_t^\pi \cup \{t + \delta_t\})} \mathbb{E} \left[ \ell(\pi; \Theta) \mid \tilde{\mathcal{F}}_t \right].$$

Bellman optimality condition requires that at any time step  $t$ , we have

$$(\hat{\theta}_t^*, \delta_t^*) = \arg \inf_{(\hat{\theta}_t, \delta_t) \in \{0, 1\} \times \mathbb{R}_+} Q(\tilde{\mathcal{F}}_t; (\hat{\theta}_t, \delta_t)).$$

Recall from the proof of Corollary 1 that the belief process follows the following dynamics

$$\mu_{t+\Delta t} = \frac{\mu_t \cdot S_t(\Delta t) \cdot d\mathbb{P}(X^\tau(t + \Delta t) \mid \Theta = 1, X^\tau(P_t^\pi), t + \Delta t < \tau)}{\mu_t \cdot S_t(\Delta t) \cdot d\mathbb{P}(X^\tau(t + \Delta t) \mid \Theta = 1, X^\tau(P_t^\pi), t + \Delta t < \tau) + (1 - \mu_t) \cdot d\mathbb{P}(X^\tau(t + \Delta t) \mid \Theta = 0, X^\tau(P_t^\pi), t + \Delta t < \tau)},$$

which depends only on  $\mu_t$  and the most recent sample realization in the partition  $P_t^\pi$ , which we denote as  $\bar{X}^\tau(P_t^\pi)$ . Hence, the tuple  $(t, \mu_t, \bar{X}^\tau(P_t^\pi))$  is a Markov process since  $X^\tau(t)$  is Markovian, and the belief process follows the above Markovian dynamics, and time is deterministic. Since the survival probability depends only on  $\bar{X}^\tau(P_t^\pi)$ , we can write the action-value function as

$$Q(\tilde{\mathcal{F}}_t; (\hat{\theta}_t, \delta_t)) \triangleq \inf_{(\hat{\theta}_\pi, T_\pi \geq t + \delta_t, P_{T_\pi}^\pi \supset P_t^\pi \cup \{t + \delta_t\})} \mathbb{E} \left[ \ell(\pi; \Theta) \mid \mu_t, \bar{X}^\tau(P_t^\pi) \right],$$

and consequently, the optimal actions at every time step  $t$  following Bellman conditions are given by

$$(\hat{\theta}_t^*, \delta_t^*) = \arg \inf_{(\hat{\theta}_t, \delta_t) \in \{0, 1\} \times \mathbb{R}_+} \inf_{(\hat{\theta}_\pi, T_\pi \geq t + \delta_t, P_{T_\pi}^\pi \supset P_t^\pi \cup \{t + \delta_t\})} \mathbb{E} \left[ \ell(\pi; \Theta) \mid \mu_t, \bar{X}^\tau(P_t^\pi) \right].$$

Hence, at any time step  $t$ , we only need to know the tuple  $(t, \mu_t, \bar{X}^\tau(P_t^\pi))$  in order to compute the optimal action-value function, and hence, on the path to the optimal policy, knowing only  $(t, \mu_t, \bar{X}^\tau(P_t^\pi))$  suffice to generate the random process  $(T_{\pi^*}, P_{T_{\pi^*}}^{\pi^*}, \hat{\theta}_{\pi^*})$ . Hence,  $(t, \mu_t, \bar{X}^\tau(P_t^\pi))$  is a Markov sufficient statistic for  $(T_{\pi^*}, P_{T_{\pi^*}}^{\pi^*}, \hat{\theta}_{\pi^*})$ .

Note that our proof for the optimal decision rule  $\hat{\theta}_{\pi^*}$  implies that the action-value function for stopping at time  $t$ , i.e.  $\hat{\theta}_t^* \neq \emptyset$  is

$$Q(t, \mu_t, \bar{X}^\tau(P_t^\pi); (\hat{\theta}_t \neq \emptyset, \delta_t)) = C_o \mu_t \wedge C_1(1 - \mu_t) + C_d t + C_s N(P_t^\pi),$$

whereas the continuation cost at any time step  $t$  is given by finding the optimal rendezvous time  $\inf_{\delta_t \in \mathbb{R}_+} Q(t, \mu_t, \bar{X}^\tau(P_t^\pi); (\hat{\theta}_t = \emptyset, \delta_t))$ . Therefore, the optimal action-value at any time step  $t$  is given by

$$Q^*(t, \mu_t, \bar{X}^\tau(P_t^\pi); (\hat{\theta}_t \neq \emptyset, \delta_t)) = \min\{C_o \mu_t \wedge C_1(1 - \mu_t) + C_d t + C_s N(P_t^\pi), \inf_{\delta_t \in \mathbb{R}_+} Q(t, \mu_t, \bar{X}^\tau(P_t^\pi); (\hat{\theta}_t = \emptyset, \delta_t))\}.$$

The equation above determines the stopping and continuation conditions, and using the monotonicity of the survival function in both time  $t$  and the time series realizations  $\bar{X}^\tau(P_t^\pi)$ , we can show the monotonicity of the continuation set  $\mathcal{C}(t, \bar{X}^\tau(P_t^\pi))$  using the same arguments of Theorem 1 in [15].

The optimal rendezvous can be found by optimizing the time interval such that the cost of stopping in the next time step is minimized. Hence, we have that

$$\begin{aligned}
\delta_t^{\pi^*} &= \inf_{\delta_t \in \mathbb{R}_+} Q(t, \mu_t, \bar{X}^\tau(P_t^\pi); (\hat{\theta}_t = \emptyset, \delta_t)) \\
&= \inf_{\delta_t \in \mathbb{R}_+} \mathbb{E} \left[ (C_o \mu_{t+\delta_t} \wedge C_1(1 - \mu_{t+\delta_t}) + C_d t + \delta_t) \mathbf{1}_{\{t+\delta_t < \tau\}} + C_r \mathbf{1}_{\{t+\delta_t \geq \tau\}} + C_s N(P_t^\pi) + 1 \mid \tilde{\mathcal{F}}_t \right] \\
&= \inf_{\delta_t \in \mathbb{R}_+} \left( (C_1 - C_o) \mathbb{P}(\mu_{t+\Delta t} \geq \frac{C_1}{C_o + C_1}) + C_1 \right) S_t(\delta_t) + C_r(1 - S_t(\delta_t)), \tag{3}
\end{aligned}$$

where  $\mathbb{P}(\mu_{t+\Delta t} \geq \frac{C_1}{C_o + C_1})$  can be written as  $\mathbb{P}(I_t(\Delta t) \geq \frac{C_1}{C_o + C_1} - \mu_t)$ , where  $I_t(\Delta t) = \mu_{t+\Delta t} - \mu_t$  is the information gain.  $\square$
